# Supplementary material for: Allosteric Inter-Domain Contacts in Bacterial Hsp70 Are Located in Regions That Avoid Insertion and Deletion Events
Source: MDPI journal article supplement (doi:10.3390/ijms23052788), 2022-03-03
Supplement: s1 [file s1]

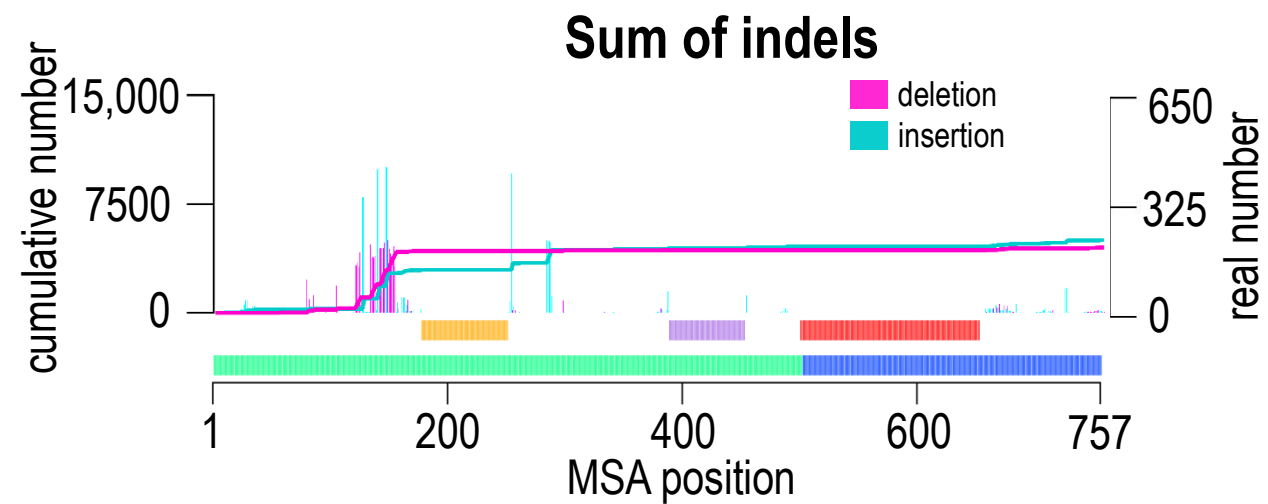

**Figure S1.** Cumulative sum of indels with real number of indels.

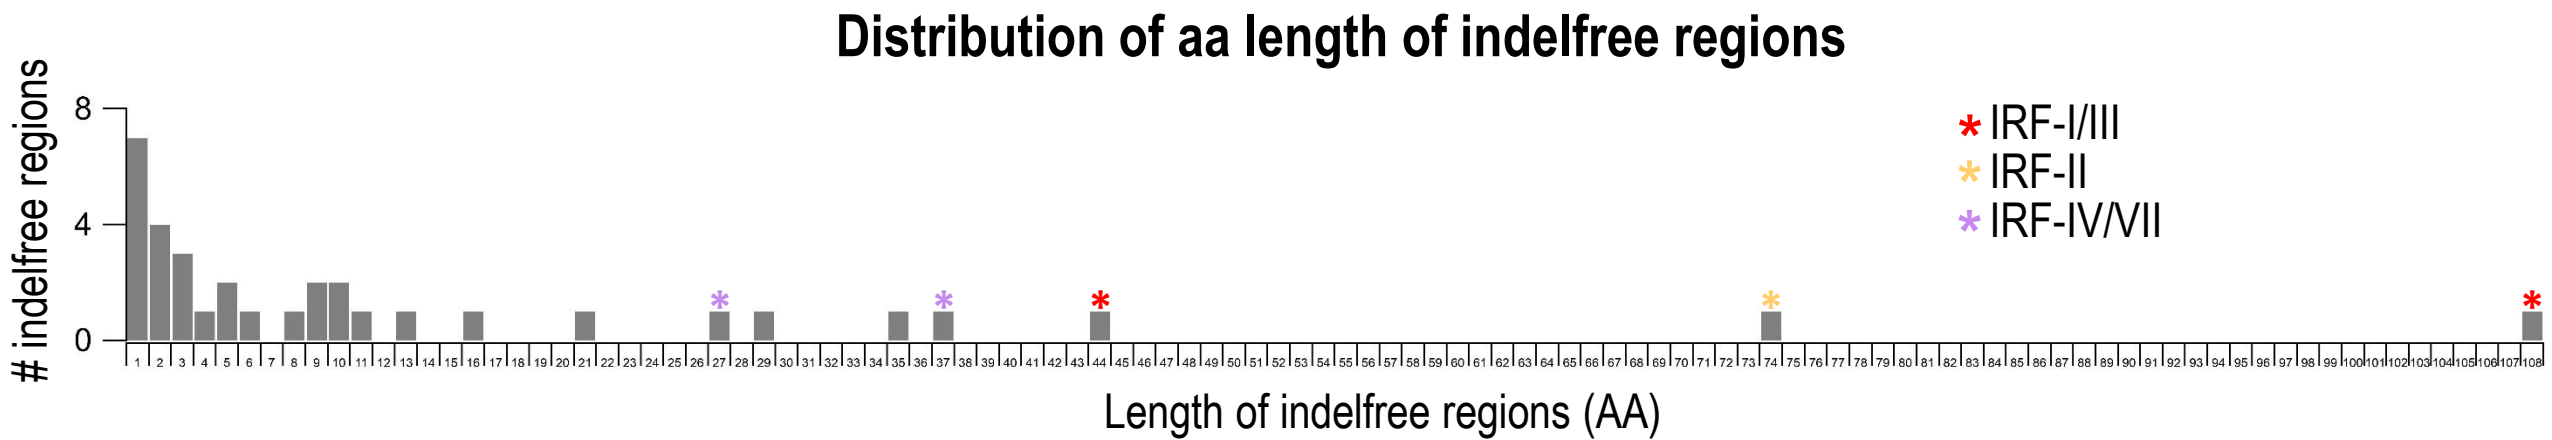

**Figure S2.** Various size distribution of indel-free regions.

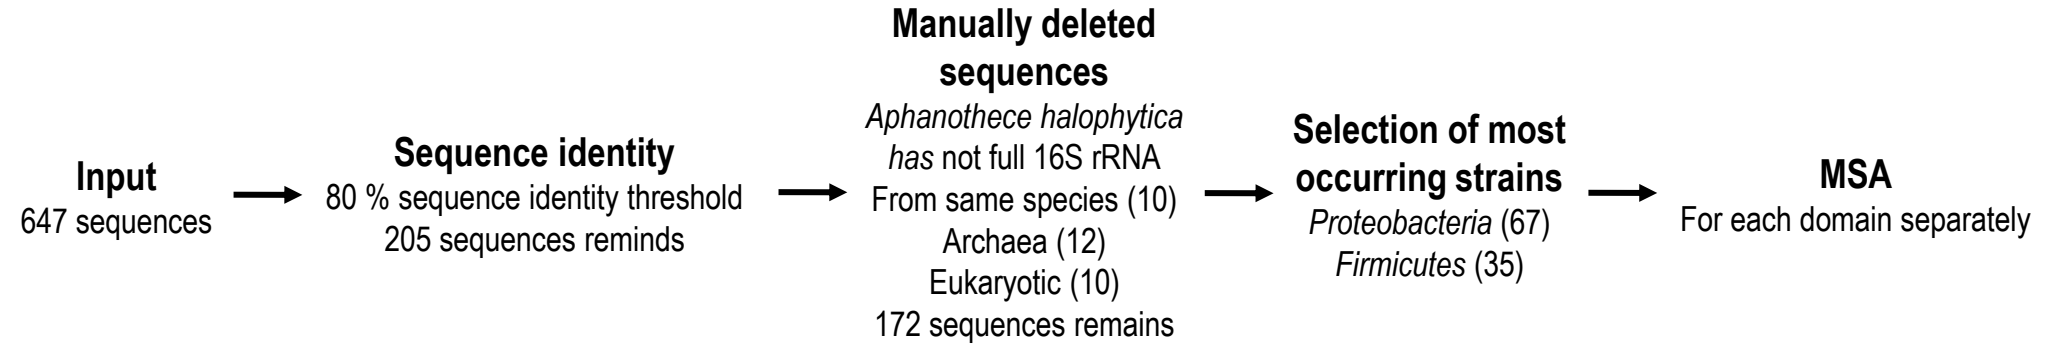

**Figure S3.** Workflow of sequence selection steps and choosing final taxons.

**Table S1.** Average Cα-Cα residue distance in selected Hsp70 proteins.

| Strain                          | Pdb  | Form                                                   | Method            | Average Cα-Cα distance (Å) | References (doi)             |
|---------------------------------|------|--------------------------------------------------------|-------------------|----------------------------|------------------------------|
| <i>Escherichia coli</i>         | 7KO2 | Restraining state                                      | X-RAY DIFFRACTION | 36.49                      | 10.1016/j.molcel.2021.07.039 |
| <i>Escherichia coli</i>         | 7KRT | Restraining state of a truncated DnaK                  | X-RAY DIFFRACTION | 36.65                      | 10.1016/j.molcel.2021.07.039 |
| <i>Escherichia coli</i>         | 5NRO | J-domain bound                                         | X-RAY DIFFRACTION | 36.78                      | 10.1016/j.molcel.2017.12.003 |
| <i>Escherichia coli</i>         | 4JNE | Allosteric opening                                     | X-RAY DIFFRACTION | 36.97                      | 10.1038/nsmb.2583            |
| <i>Escherichia coli</i>         | 7KRW | Stimulating state fused with a substrate               | X-RAY DIFFRACTION | 39.71                      | 10.1016/j.molcel.2021.07.039 |
| <i>Escherichia coli</i>         | 7KRV | Stimulating state of disulfide-bridged                 | X-RAY DIFFRACTION | 34.31                      | 10.1016/j.molcel.2021.07.039 |
| <i>Escherichia coli</i>         | 7KZI | Intermediate state (QQQ)                               | X-RAY DIFFRACTION | 38.46                      | 10.1107/S2059798321002436    |
| <i>Escherichia coli</i>         | 7KZU | Quasi-intermediate state (Q) of a truncated Hsp70 DnaK | X-RAY DIFFRACTION | 31.99                      | 10.1107/S2059798321002436    |
| <i>Escherichia coli</i>         | 4JN4 | Allosteric opening                                     | X-RAY DIFFRACTION | 37.03                      | 10.1038/nsmb.2583            |
| <i>Escherichia coli</i>         | 7KRU | Stimulating state of a truncated DnaK                  | X-RAY DIFFRACTION | 34.35                      | 10.1074/jbc.M708992200       |
| <i>Geobacillus kaustophilus</i> | 2V7Y | Post-ATP hydrolysis state                              | X-RAY DIFFRACTION | 45.92                      | 10.1074/jbc.M708992200       |
| <i>Homo sapiens</i>             | 5E84 | ATP-bound state                                        | X-RAY DIFFRACTION | 37.2                       | 10.1016/j.str.2015.10.012    |
| <i>Homo sapiens</i>             | 6ASY | ATP-bound state                                        | X-RAY DIFFRACTION | 36.32                      | 10.1038/s41467-017-01310-z   |
| <i>Homo sapiens</i>             | 7N1R | ATP hydrolysis to AMP (open conformation)              | X-RAY DIFFRACTION | 36.29                      | 10.1002/pro.4267             |
| <i>Homo sapiens</i>             | 3D2F | In complex with Sse1p                                  | X-RAY DIFFRACTION | 38.42                      | 10.1016/j.cell.2008.05.022   |

**Table S2.** Phylogenetic distribution of 172 sequences.

| Phylum                       | # bacteria |
|------------------------------|------------|
| <i>Acidobacteria</i>         | 1          |
| <i>Actinobacterila</i>       | 16         |
| <i>Aquificae</i>             | 1          |
| <i>Bacteroidetes</i>         | 11         |
| <i>Chlamydiae</i>            | 2          |
| <i>Chlorobi</i>              | 3          |
| <i>Chloroflexi</i>           | 2          |
| <i>Cyanobacteria</i>         | 7          |
| <i>Deinococcus-thermus</i>   | 2          |
| <i>Dictyoglomi</i>           | 1          |
| <i>Elusimicrobia</i>         | 2          |
| <b><i>Firmicutes</i></b>     | <b>35</b>  |
| <i>Fusobacteria</i>          | 1          |
| <i>Nitrospirae</i>           | 1          |
| <i>Planctomycetes</i>        | 1          |
| <b><i>Proteobacteria</i></b> | <b>67</b>  |
| <i>Spirochaetes</i>          | 3          |
| <i>Tenericutes</i>           | 13         |
| <i>Thermotogae</i>           | 1          |
| <i>Verrucomicrobia</i>       | 2          |

**Figure S4.** First ML phylogenetic tree of 102 *Firmicutes* and *Proteobacteria* sequences with bootstrap values of nodes.

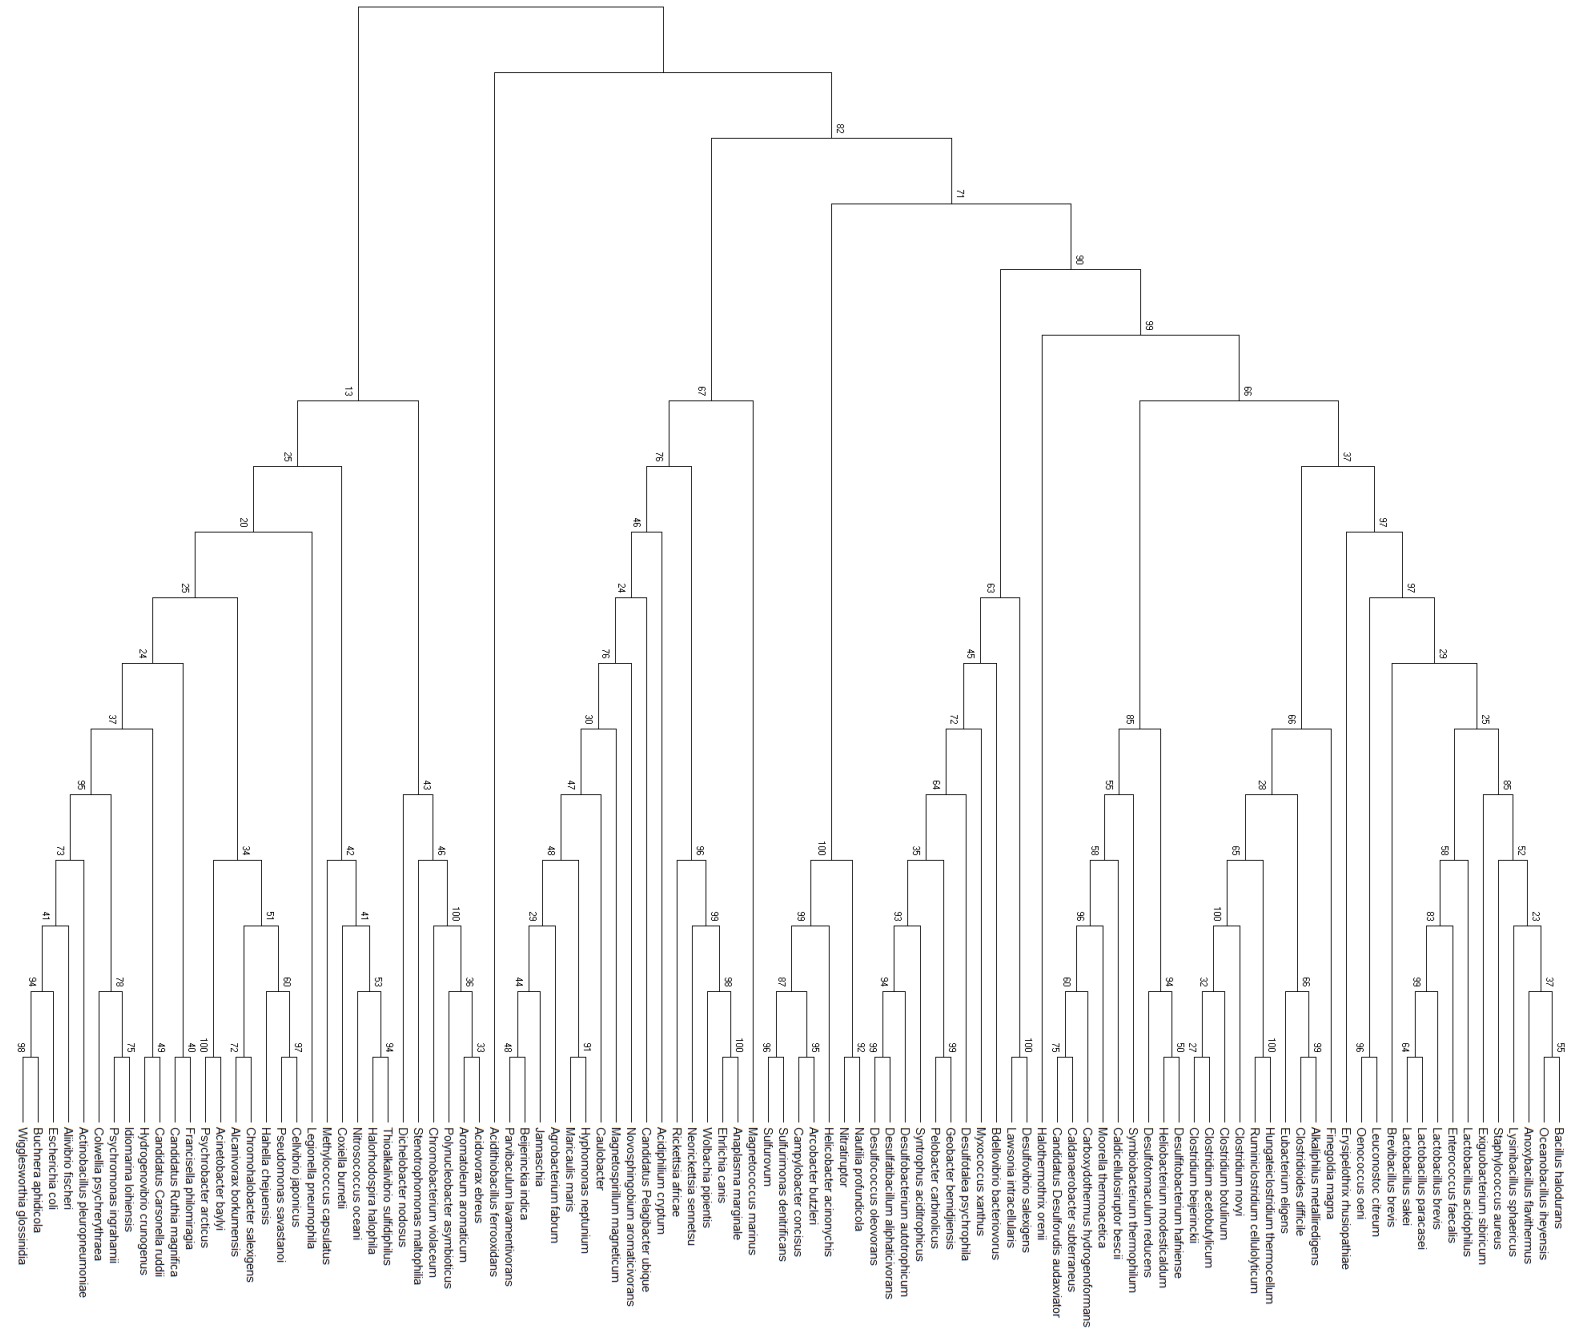

**Figure S5.** Condensed version of first ML phylogenetic tree of 102 *Firmicutes* and *Proteobacteria* sequences with bootstrap threshold set to 70%. 12 bacteria did not have any node (red color).

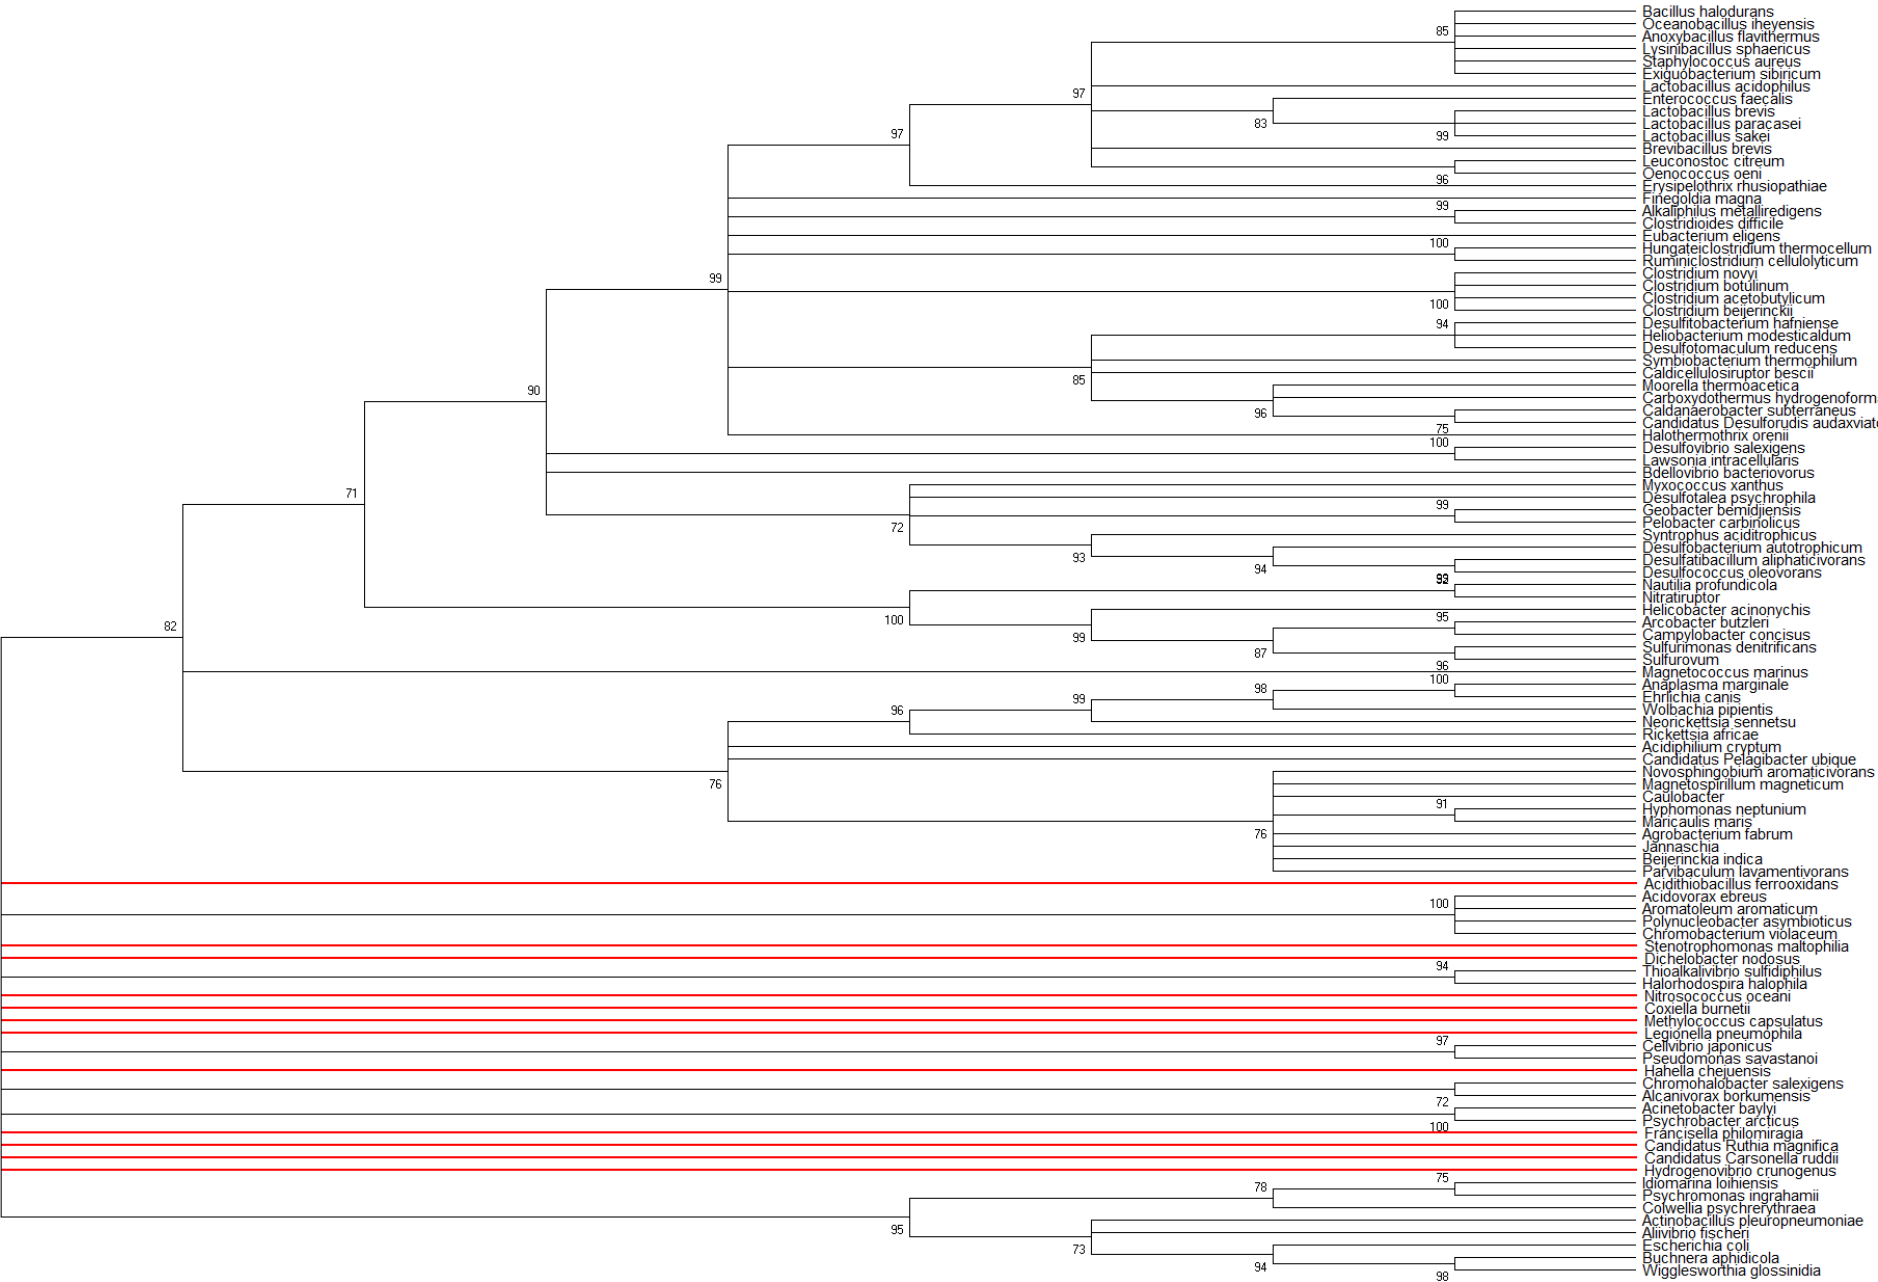

**Table S3.** Final list of 90 *Proteobacteria* and *Firmicutes* strains.

| <i>Proteobacteria</i>                  |                                        |                                           | <i>Firmicutes</i>                          |                                         |
|----------------------------------------|----------------------------------------|-------------------------------------------|--------------------------------------------|-----------------------------------------|
| <i>Buchnera aphidicola</i>             | <i>Aromatoleum aromaticum</i>          | <i>Nitratiruptor</i>                      | <i>Halothermothrix orenii</i>              | <i>Ruminiclostridium cellulolyticum</i> |
| <i>Wigglesworthia glossinidia</i>      | <i>Magnetococcus marinus</i>           | <i>Helicobacter acinonychis</i>           | <i>Caldanaerobacter subterraneus</i>       | <i>Erysipelothrix rhusiopathiae</i>     |
| <i>Escherichia coli</i>                | <i>Anaplasma marginale</i>             | <i>Arcobacter butzleri</i>                | <i>Carboxydotherrmus hydrogenoformans</i>  | <i>Bacillus halodurans</i>              |
| <i>Actinobacillus pleuropneumoniae</i> | <i>Ehrlichia canis</i>                 | <i>Campylobacter concisus</i>             | <i>Candidatus Desulforudis audaxviator</i> | <i>Anoxybacillus flavithermus</i>       |
| <i>Aliivibrio fischeri</i>             | <i>Wolbachia pipientis</i>             | <i>Sulfurimonas denitrificans</i>         | <i>Moorella thermoacetica</i>              | <i>Oceanobacillus iheyensis</i>         |
| <i>Colwellia psychrerythraea</i>       | <i>Neorickettsia sennetsu</i>          | <i>Sulfurovum</i>                         | <i>Caldicellulosiruptor bescii</i>         | <i>Staphylococcus aureus</i>            |
| <i>Idiomarina loihiensis</i>           | <i>Rickettsia africae</i>              | <i>Desulfovibrio salexigens</i>           | <i>Symbiobacterium thermophilum</i>        | <i>Lysinibacillus sphaericus</i>        |
| <i>Psychromonas ingrahamii</i>         | <i>Candidatus Pelagibacter ubique</i>  | <i>Lawsonia intracellularis</i>           | <i>Desulfotomaculum reducens</i>           | <i>Exiguobacterium sibiricum</i>        |
| <i>Acinetobacter baylyi</i>            | <i>Acidiphilium cryptum</i>            | <i>Bdellovibrio bacteriovorus</i>         | <i>Desulfitobacterium hafniense</i>        | <i>Brevibacillus brevis</i>             |
| <i>Psychrobacter arcticus</i>          | <i>Novosphingobium aromaticivorans</i> | <i>Myxococcus xanthus</i>                 | <i>Heliobacterium modesticaldum</i>        | <i>Leuconostoc citreum</i>              |
| <i>Chromohalobacter salexigens</i>     | <i>Caulobacter</i>                     | <i>Geobacter bemidjensis</i>              | <i>Clostridium acetobutylicum</i>          | <i>Oenococcus oeni</i>                  |
| <i>Alcanivorax borkumensis</i>         | <i>Magnetospirillum magneticum</i>     | <i>Pelobacter carbinolicus</i>            | <i>Clostridium beijerinckii</i>            | <i>Lactobacillus acidophilus</i>        |
| <i>Cellvibrio japonicus</i>            | <i>Hyphomonas neptunium</i>            | <i>Desulfotalea psychrophila</i>          | <i>Clostridium botulinum</i>               | <i>Enterococcus faecalis</i>            |
| <i>Pseudomonas savastanoi</i>          | <i>Maricaulis maris</i>                | <i>Syntrophus aciditrophicus</i>          | <i>Clostridium novyi</i>                   | <i>Lactobacillus brevis</i>             |
| <i>Thioalkalivibrio sulfidiphilus</i>  | <i>Jannaschia</i>                      | <i>Desulfobacterium autotrophicum</i>     | <i>Finegoldia magna</i>                    | <i>Lactobacillus paracasei</i>          |
| <i>Halorhodospira halophila</i>        | <i>Parvibaculum lavamentivorans</i>    | <i>Desulfatibacillum aliphaticivorans</i> | <i>Eubacterium eligens</i>                 | <i>Lactobacillus sakei</i>              |
| <i>Chromobacterium violaceum</i>       | <i>Agrobacterium fabrum</i>            | <i>Desulfococcus oleovorans</i>           | <i>Alkaliphilus metalliredigens</i>        |                                         |
| <i>Polynucleobacter asymbioticus</i>   | <i>Beijerinckia indica</i>             |                                           | <i>Clostridioides difficile</i>            |                                         |
| <i>Acidovorax ebreus</i>               | <i>Nautilia profundicola</i>           |                                           | <i>Hungateiclostridium thermocellum</i>    |                                         |



## Ancestral structures estimated residue error

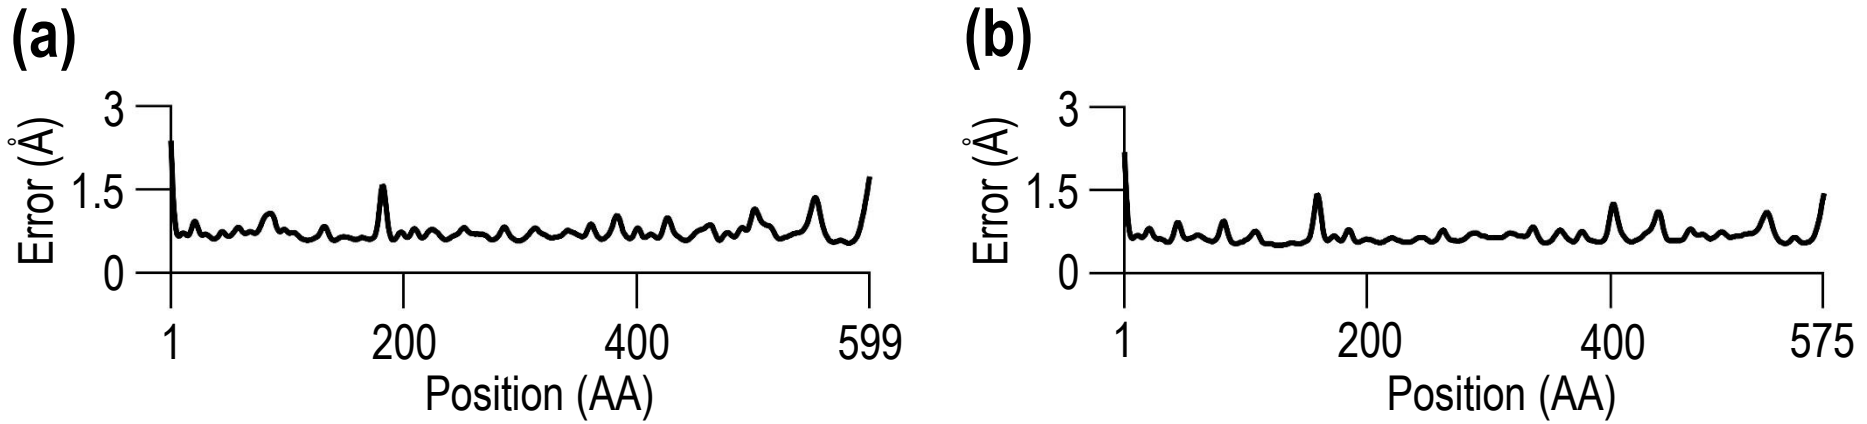

**Figure S6.** Ancestral structures estimated residue error. **(a)** Estimated error of *Proteobacteria* ancestral node 52. **(b)** Estimated error of *Firmicutes* ancestral node 45.

**Table S4.** List of calculation points for *Proteobacteria* divergence time estimation.

| 1. taxon                           | 2. taxon                        | Min Time | Max Time | Estimated divergence time (MY) |
|------------------------------------|---------------------------------|----------|----------|--------------------------------|
| <i>Escherichia coli</i>            | <i>Buchnera aphidicola</i>      | 850      | 900      | 898.88                         |
| <i>Colwellia psychrerythraea</i>   | <i>Psychromonas ingrahamii</i>  | 663.1    | 668.4    | 667.05                         |
| <i>Buchnera aphidicola</i>         | <i>Psychromonas ingrahamii</i>  | 1673     | 2223     | 1697.25                        |
| <i>Acinetobacter baylyi</i>        | <i>Pseudomonas savastanoi</i>   | 1306     | 1342     | 1326.21                        |
| <i>Buchnera aphidicola</i>         | <i>Pseudomonas savastanoi</i>   | 1313     | 1753     | 1732.38                        |
| <i>Chromobacterium violaceum</i>   | <i>Aromatoleum aromaticum</i>   | 1271.4   | 1834.4   | 1271.4                         |
| <i>Buchnera aphidicola</i>         | <i>Aromatoleum aromaticum</i>   | 2138     | 2879     | 2138                           |
| <i>Buchnera aphidicola</i>         | <i>Beijerinckia indica</i>      | 1707     | 2867     | 2676.9                         |
| <i>Magnetospirillum magneticum</i> | <i>Beijerinckia indica</i>      | 1886     | 2260     | 1886                           |
| <i>Anaplasma marginale</i>         | <i>Beijerinckia indica</i>      | 1886     | 2260     | 2101.73                        |
| <i>Buchnera aphidicola</i>         | <i>Sulfurovum</i>               | 2808     | 2981     | 2808                           |
| <i>Helicobacter acinonychis</i>    | <i>Arcobacter butzleri</i>      | 841      | 1572     | 1001.18                        |
| <i>Geobacter bemidjensis</i>       | <i>Desulfococcus oleovorans</i> | 2173     | 2420     | 2194.7                         |
| <i>Desulfovibrio salexigens</i>    | <i>Desulfococcus oleovorans</i> | 2309     | 2508     | 2508                           |
| <i>Geobacter bemidjensis</i>       | <i>Pelobacter carbinolicus</i>  | 1338.8   | 1412.9   | 1412.9                         |
| <i>Myxococcus xanthus</i>          | <i>Geobacter bemidjensis</i>    | 2173     | 2420     | 2237.41                        |

**Table S5.** List of calculation points for *Firmicutes* divergence time estimation.

| 1. taxon                         | 2. taxon                                   | Min Time | Max Time | Estimated divergence time (MY) |
|----------------------------------|--------------------------------------------|----------|----------|--------------------------------|
| <i>Moorella thermoacetica</i>    | <i>Candidatus Desulforudis audaxviator</i> | 1997     | 2381     | 1997                           |
| <i>Desulfotomaculum reducens</i> | <i>Desulfitobacterium hafniense</i>        | 1682     | 3181     | 2025.36                        |
| <i>Clostridium novyi</i>         | <i>Clostridium botulinum</i>               | 196      | 2244     | 1134.1                         |
| <i>Clostridioides difficile</i>  | <i>Alkaliphilus metalliredigens</i>        | 1823     | 3493     | 1823                           |
| <i>Exiguobacterium sibiricum</i> | <i>Bacillus halodurans</i>                 | 1566     | 1814     | 1609.82                        |
| <i>Lactobacillus sakei</i>       | <i>Haloferoxthermus orenii</i>             | 2482     | 3025     | 3025                           |
| <i>Lactobacillus sakei</i>       | <i>Bacillus halodurans</i>                 | 1698     | 2100     | 1777.1                         |
| <i>Lactobacillus sakei</i>       | <i>Enterococcus faecalis</i>               | 805      | 1401     | 1243.95                        |
| <i>Clostridioides difficile</i>  | <i>Eubacterium eligens</i>                 | 1823     | 3493     | 2380.1                         |

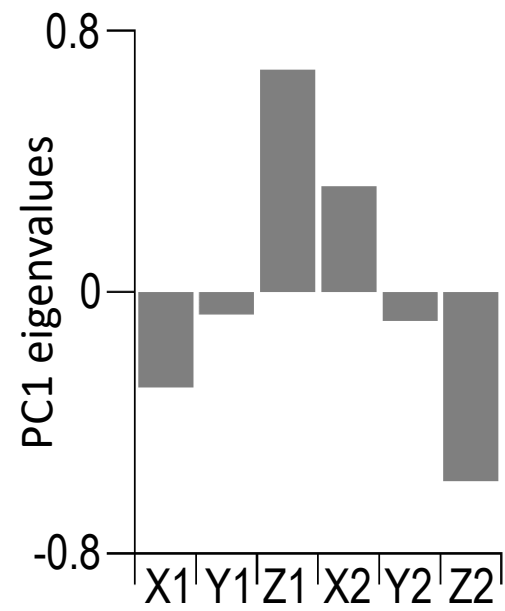

**Figure S7.** Eigenvalues of PC1. The highest space position variance for both contact residues show Z axis.
